# Supplementary material for: Integration of single cell data by disentangled representation learning
Source: PubMed Central journal article supplement — Nucleic Acids Res. 2021 Nov 24;50(2):e8. doi: 10.1093/nar/gkab978 (PMC8788944; doi:10.1093/nar/gkab978), 2021-11-24
Supplement: gkab978_supplemental_file.pdf [file gkab978_supplemental_file.pdf]

# Supplementary

## Parameter Selection

There are several parameters to be determined in SCIDRL, including the hyperparameters of the network and parameters  $\beta$  (the weight for the noise classifier) and  $\lambda$  (the weight for the discriminator). Experiments show that the performances are similar for a wide range of hyperparameters of the network. In our experiments, the default setting of manually optimized parameters is: depth of the autoencoder=3 with 64-10-64 neurons, depth of the noise classifier =1, depth of the discriminator =3 with 32-16-4 neurons, the weight of noise classifier  $\beta = 1$ .

The most important parameter is the weight of the discriminator  $\lambda$ , which controls the trade-off between the generation of biological representations and the discrimination of them in different batches. It varies from 0.1 to 5 experimentally. The default value of  $\lambda = 0.1$  is usually sufficient for achieving reasonable results for most analyses. To identify the best parameter for better integration, we proposed a quantitative heuristic strategy. To select the best parameter  $\lambda$  in a data-specific way, 1) we firstly compute the discriminator's loss  $\widehat{loss}_2$  over the candidate parameter choices ( $\lambda = 0.1, 0.5$  or  $1$ ) and select the minimum value (i.e.  $\lambda_{base}$ ), at which  $\widehat{loss}_2$  has the tendency to firstly decrease and then increase. The discriminator's loss  $\widehat{loss}_2$  measures how well mixtures of cells from different batches. In the training process, the discriminator's loss  $\widehat{loss}_2$  usually decreases sharply during the beginning epochs, which indicates that the discriminator is well trained to classify different batches. After several epochs, the discriminator's loss increases to be stable and displays very limited fluctuations. 2) We then just compute the LISI-batch of each cell cluster over a grid of candidate parameter choices ( $\lambda = \lambda_{base}:\lambda_{step}:5$ , in which  $\lambda_{step}=0.1$  when  $\lambda_{base}=0.1$  or  $0.5$  and  $\lambda_{step}=1$  when  $\lambda_{base} = 1$ ) and select the elbow value (i.e.  $\lambda_{critical}$ ) that increasing it sharply. The cell clusters are determined by running Seurat with the default resolution value as 0.1 on the cells in the integrated representation space when  $\lambda = \lambda_{base}$ . Although the cell clusters assigned by Seurat with default parameter may not be in complete agreement with the biological ground-truth, they can still reflect a certain layer of the cell type hierarchy tree. The optimal value  $\lambda_{optim}$  is obtained by  $\lambda_{critical}-\lambda_{step}$ .  $\lambda_{optim}$  will be further examined by UMAP visualizations, to be specific, test if some clusters, especially distant clusters, are mixed up when  $\lambda = \lambda_{optim}$ .

We displayed some examples in Figure S4. Firstly, determine  $\lambda_{base}$  in all datasets we used. We find that  $\lambda_{base}$  of simulated, pancreas, DC, cell line, mouse hematopoietic, human cerebral organoids, mouse retina, mouse brain, PBMC and eight organ datasets can be set as 0.1, whereas, it can be set as 0.5 of mouse atlas and mouse cortex datasets, which can be intuitively visualized by the variation curves of  $\widehat{loss}_2$  in Figure S4A&S4B. Secondly, determine  $\lambda_{critical}$  from UMAP visualizations and LISI-batch. In simulated 2 dataset (Figure S4C), when  $\lambda = \lambda_{base}$ , the LISI-batch of cluster 0 is close to 2 and are close to 1 for the remaining clusters (left first), which indicates cluster 0 has two batches and the other clusters have one batch. This phenomenon is further proved by UMAP visualization that only cluster 0 has two batches mixed (left second). Observing the curve, we find that when  $\lambda = 0.5$ , the LISI-batch of cluster 1 and cluster 5 have remarkable rise from 1 to 2, and it has obvious reduction from 2 to 1 for cluster 0, which warns us  $\lambda_{critical}$  may be 0.5 (left first). As expected, the UMAP visualization of  $\lambda = 0.5$  shows that cluster 0,1 and 5 are blended (left third), and the cell type labels indicate that Group 1, Group 2 and Group 5 are grouped together (left fourth). So, we recommend  $\lambda_{optim} = 0.4$  for this dataset. In DC dataset (Figure S4D), when  $\lambda = 0.1$ , the LISI-batch of cluster 0,1 and 2 are 1.13, 1.78 and 1.85, which is consistent with UMAP that cluster 1 and 2 have two batches mixed, and cluster 0 has two batches separated (left first and second). When  $\lambda = 0.5$ , the LISI-batch of cluster 0 has an obvious increase from 1.13 to 1.79, which indicates fault mixture happens in cluster 0. This inference is testified by the batch mixtures of cluster 0 from UMAP visualization (left third). This occurs due to the fault mixtures of CD141 and CD1C (left fourth). For this data, we set  $\lambda_{optim} = 0.4$ . For mouse hematopoietic dataset (Figure S4E), when  $\lambda = 0.1$ , the UMAP visualization shows that cluster 2 is the only cluster that belongs to one batch (left second), which is consistent with 1.06 of LISI-batch (left first). When  $\lambda = 0.3$ , the LISI-batch of cluster 2 has a quick growth from 1.06 to 1.38 (left first). Inspecting the UMAP visualization, we find that the cells of cluster 2 are blended with cells from another batch (left third). The cell type labels show fault mixture of CMP, MPP and LTHSC (left fourth). So, we set  $\lambda_{optim}$  as 0.2. It worth noting that, at base

value, the LISI-batch of cluster 0 and 1 are 1.14 and 1.15, which indicates cluster 0 and 1 include one batch empirically. However, LISI-batch is not an absolute standard because when two batches are close but not mixed, the LISI-batch is still small. So further testified by UMAP visualization is necessary. For down-sampled pancreas dataset with alpha as shared cell type (Figure S4F), when  $\lambda = \lambda_{base}$ , we find that cluster 0 and 1 contain cells from two batches and cluster 6 belongs to 'baron' batch from UMAP (left second), the corresponding LISI-batch are 1.02, 1.17 and 1.007 (left first). Observing the variation of LISI-batch, we find that cluster 6 has steep rise from 1 to 1.73 when  $\lambda = 0.6$  (left first). Inspecting the UMAP, we find that cluster 6 mixes up with cluster 1 and 0 (left third), which is caused by the fault mixtures of alpha, gamma and epsilon cells (left fourth). It is worth noting that, the LISI-batch of cluster 8 has a relatively severe oscillation though, the UMAP visualization shows that there is no fault mixture of clusters. So,  $\lambda_{optim} = 0.5$  is an appropriate selection. As for multiple batches, we discussed cell line dataset and human cerebral organoid dataset. In cell line dataset (Figure S4G), when  $\lambda = \lambda_{base}$ , the UMAP visualization and LISI-batch indicate cluster 0, 1 and 2 contain cells from two batches (left second and first). When  $\lambda = 0.3$ , the LISI-batch of cluster 0 and 1 rise dramatically from 1.7 to 2.5 (left first), whose UMAP visualization also indicates wrong mixtures of 293t cells and jurkat cells (left fourth). So, we set  $\lambda_{optim} = 0.2$  for our comparison. In human cerebral organoid dataset (Figure S4H), when  $\lambda = 0.6$ , we find that the LISI-batch of cluster 2, 3, 6 and 8 have obvious rise, especially for cluster 8, which is from 1.9 to 2.3 (left first). The UMAP visualization of  $\lambda = 0.6$  shows that cluster 2, 3 and 8 are mixed (left third), which is caused by the mixing of GE NPCs, cortical NPCs and Non-telencephalon NPCs (left fourth). For this dataset, we select  $\lambda_{optim} = 0.5$ . For Pancreas dataset (Figure S4I), when  $\lambda = \lambda_{base}$ , we find all clusters have two batches mixed (left second), although some mixtures are insufficient from UMAP visualization. When  $\lambda = 1$ , no cluster is mixed wrongly, and the batches are mixed more thoroughly (left third). In this case, the rise of LISI-batch indicates more thorough integration. In a word, these examples testified the effectiveness of our strategy.

# FIGURES AND TABLES

A

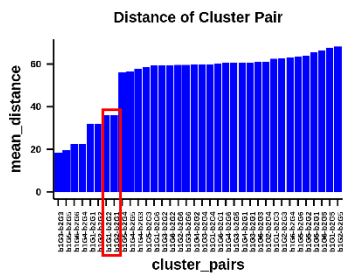

B

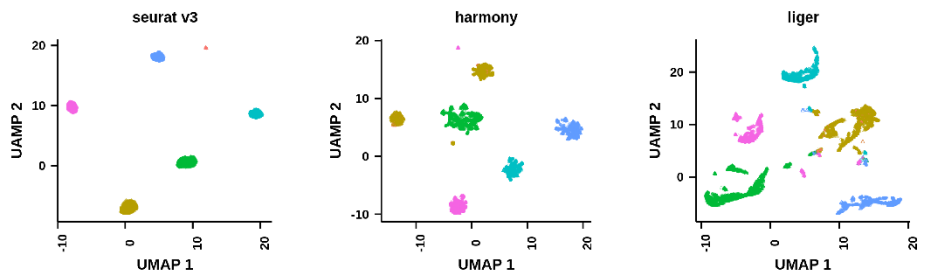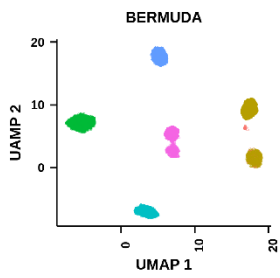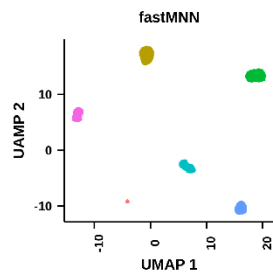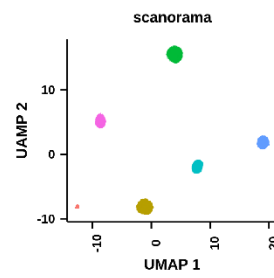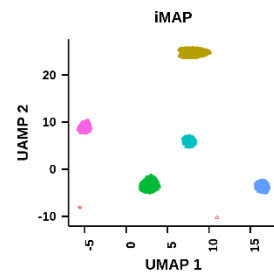

C

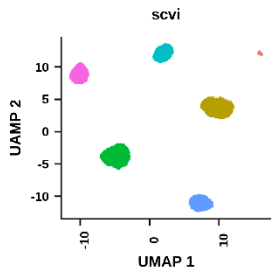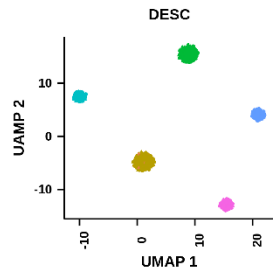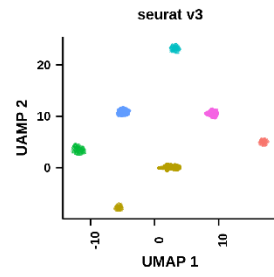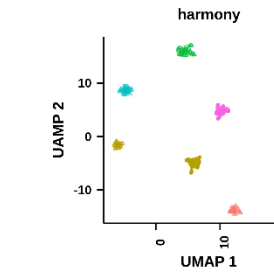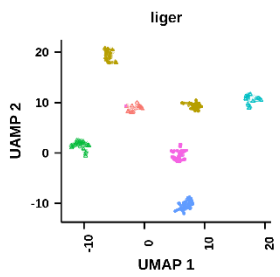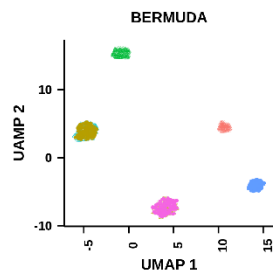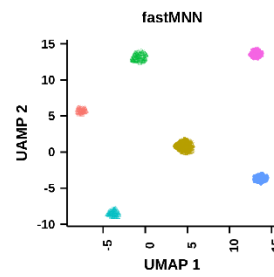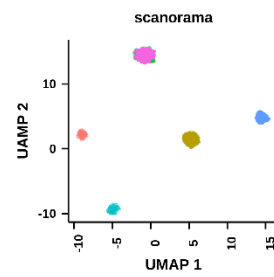

D

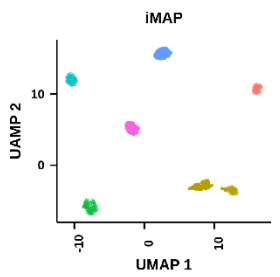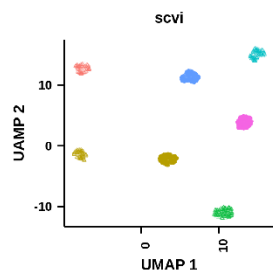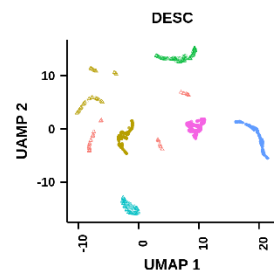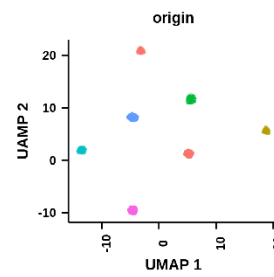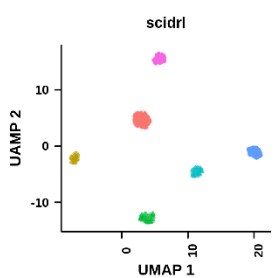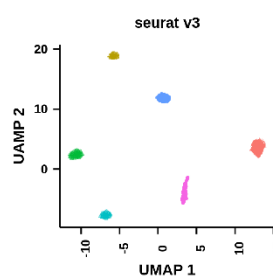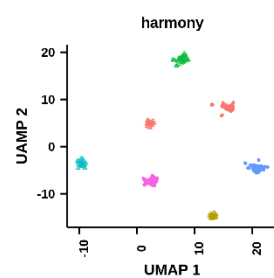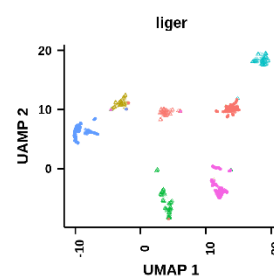

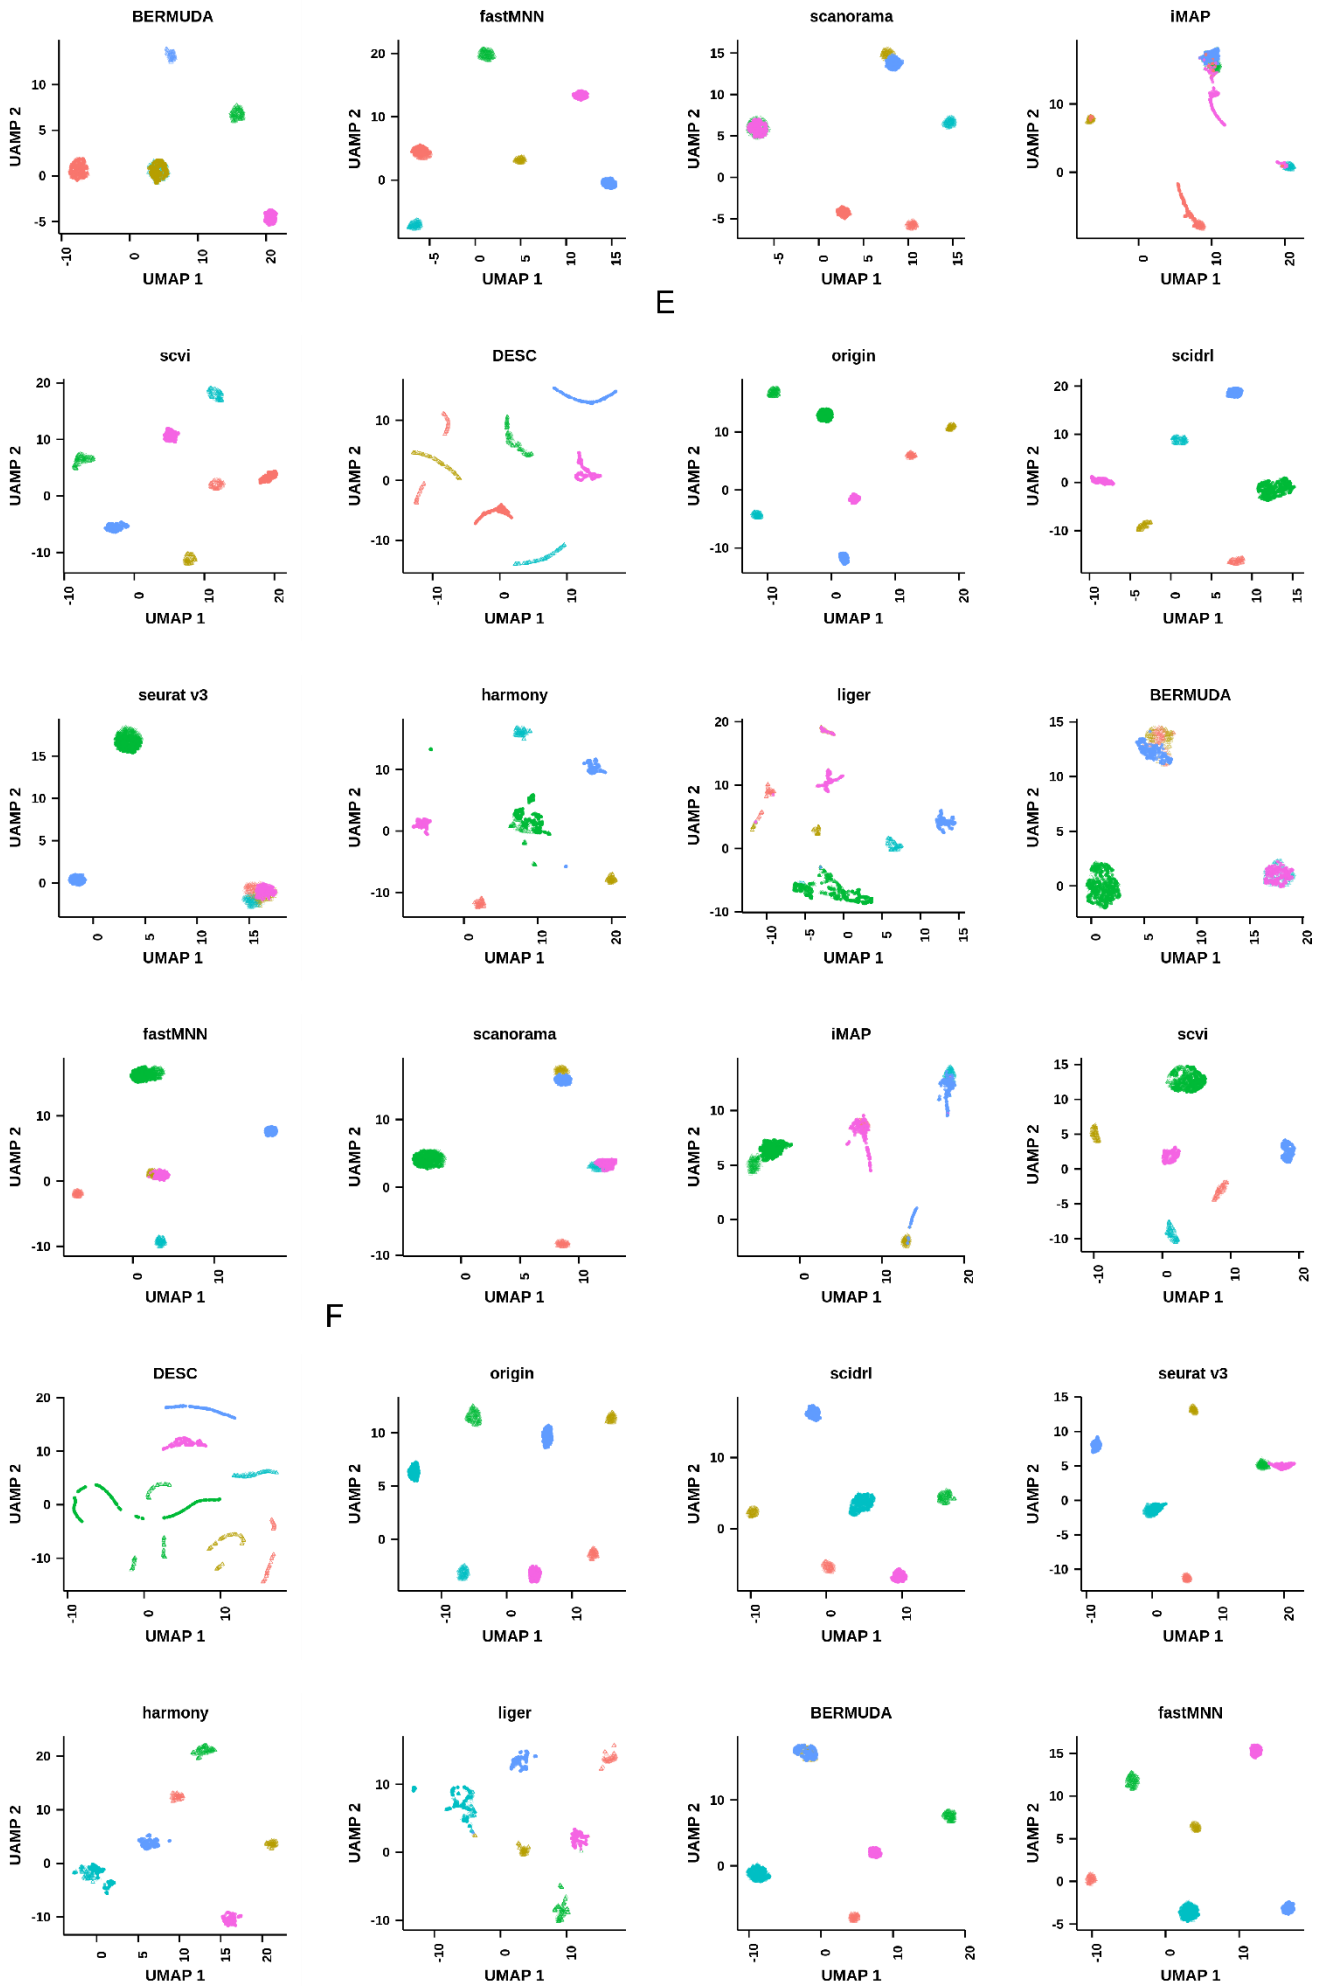

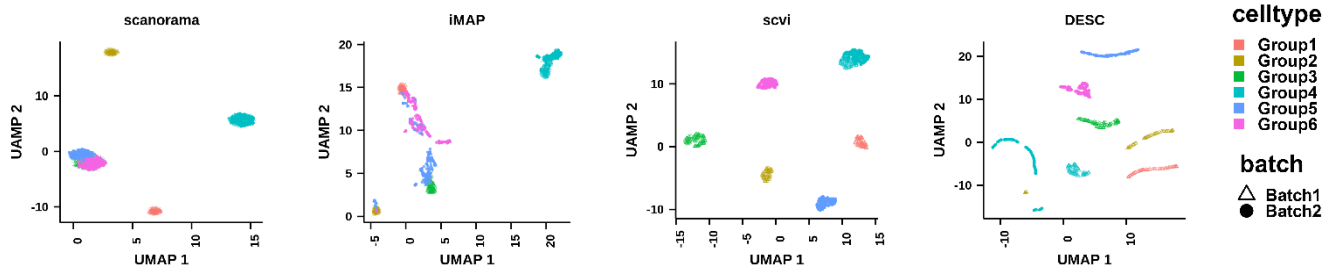

**Figure S1. Removing batch effect in simulated data.**

A. Distances of cell types in different batches. The red box highlights the nearest cell type pairs in different batches.

B-F. Performance comparison of ten integrated methods for UMAP visualizations on datasets with rare cell types (B) and datasets with one shared cell types: Group2, Group1, Group3 or Group4 (C-F). Each point represents a cell and the cell is colored according to its known cell type label and shaped according to its batch label.

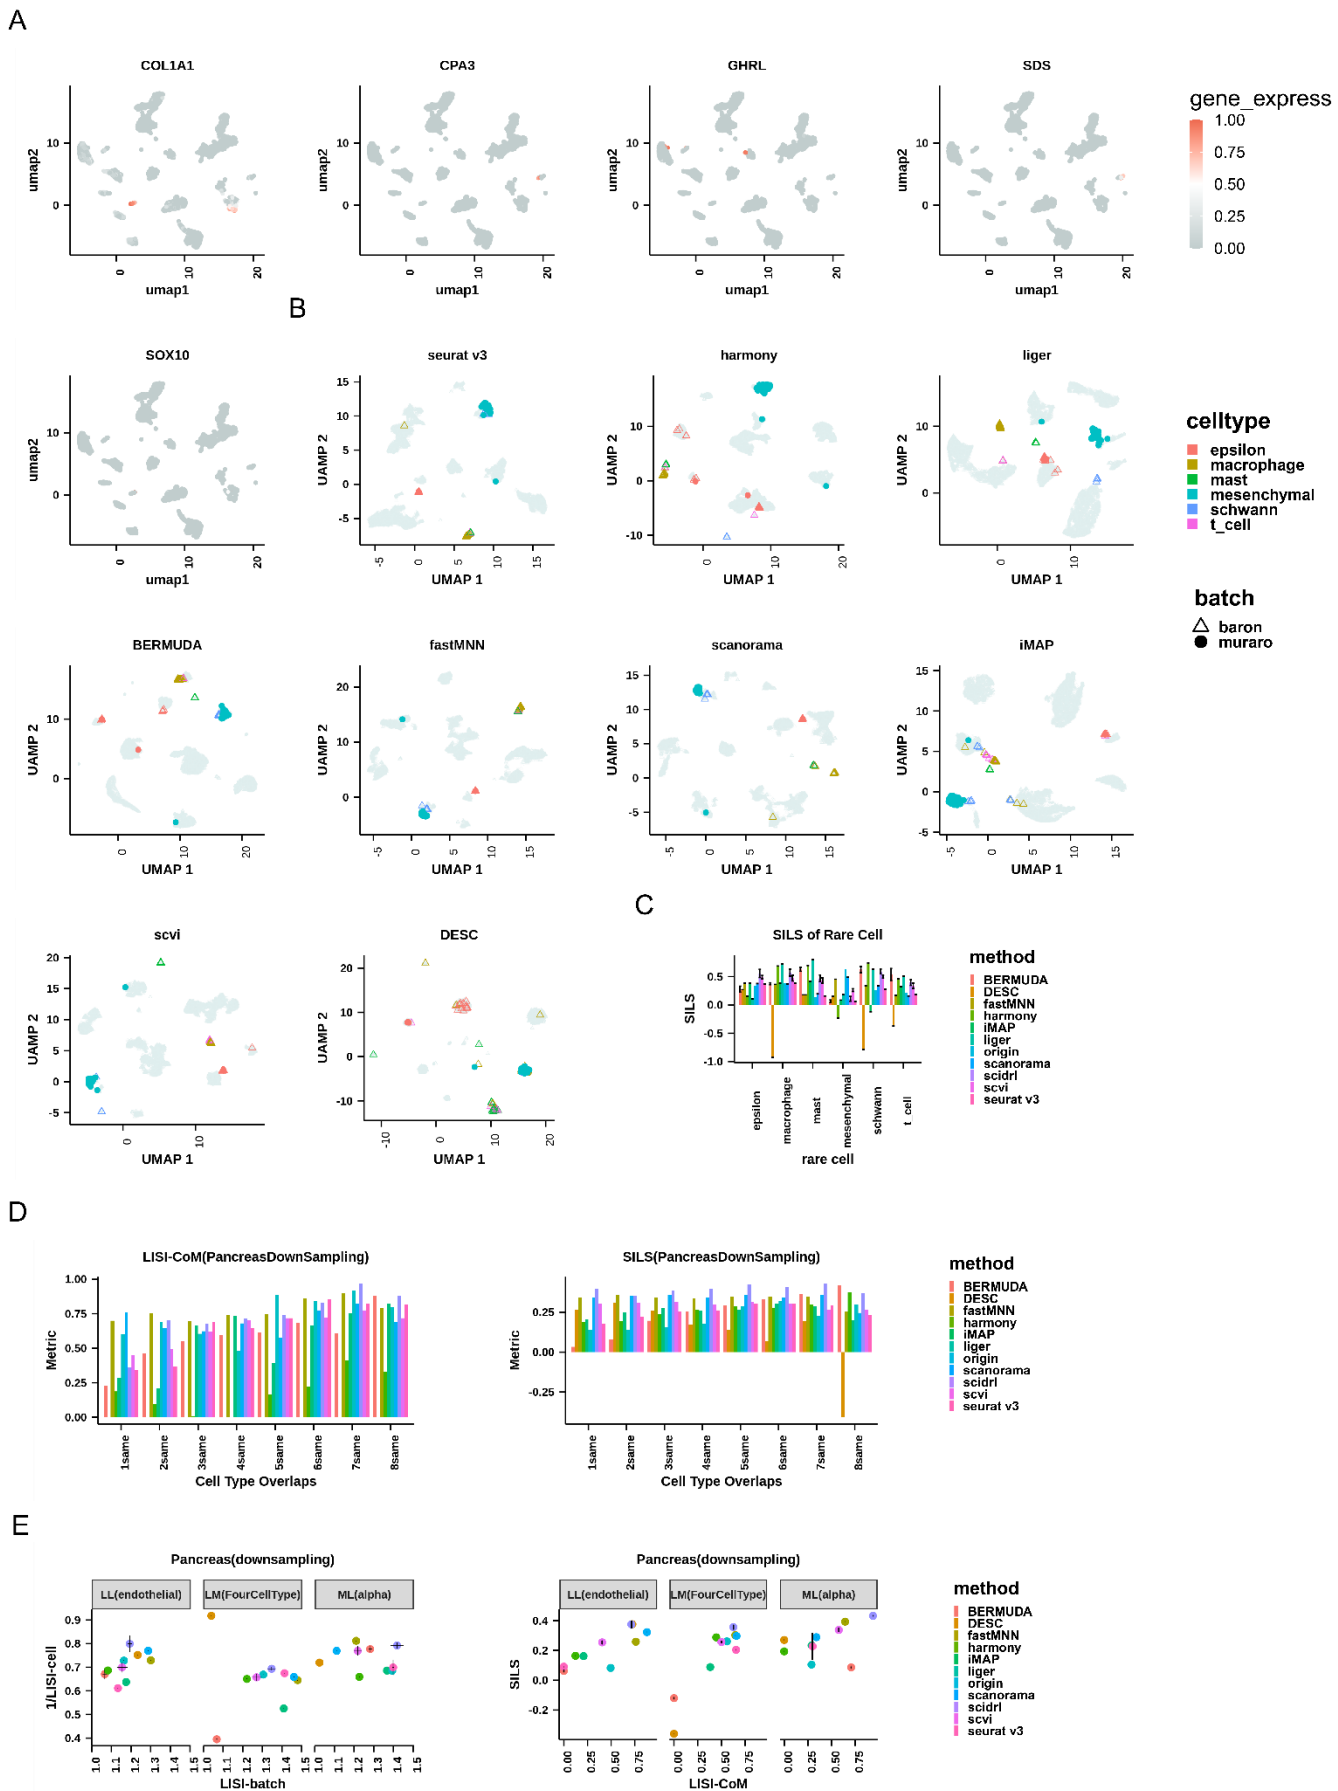

F

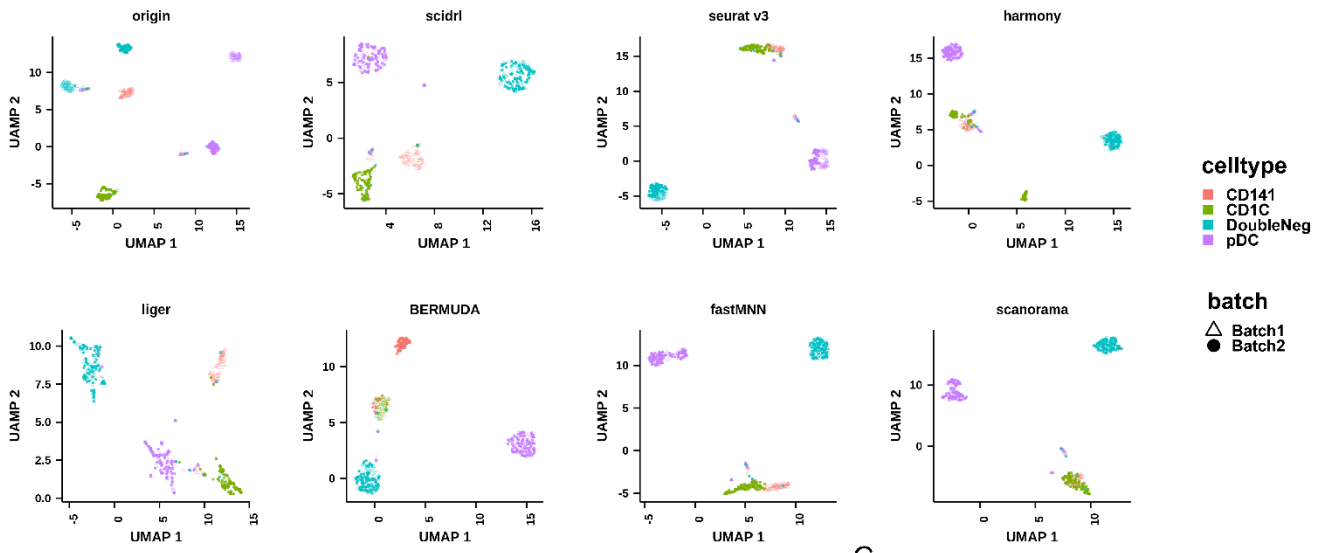

G

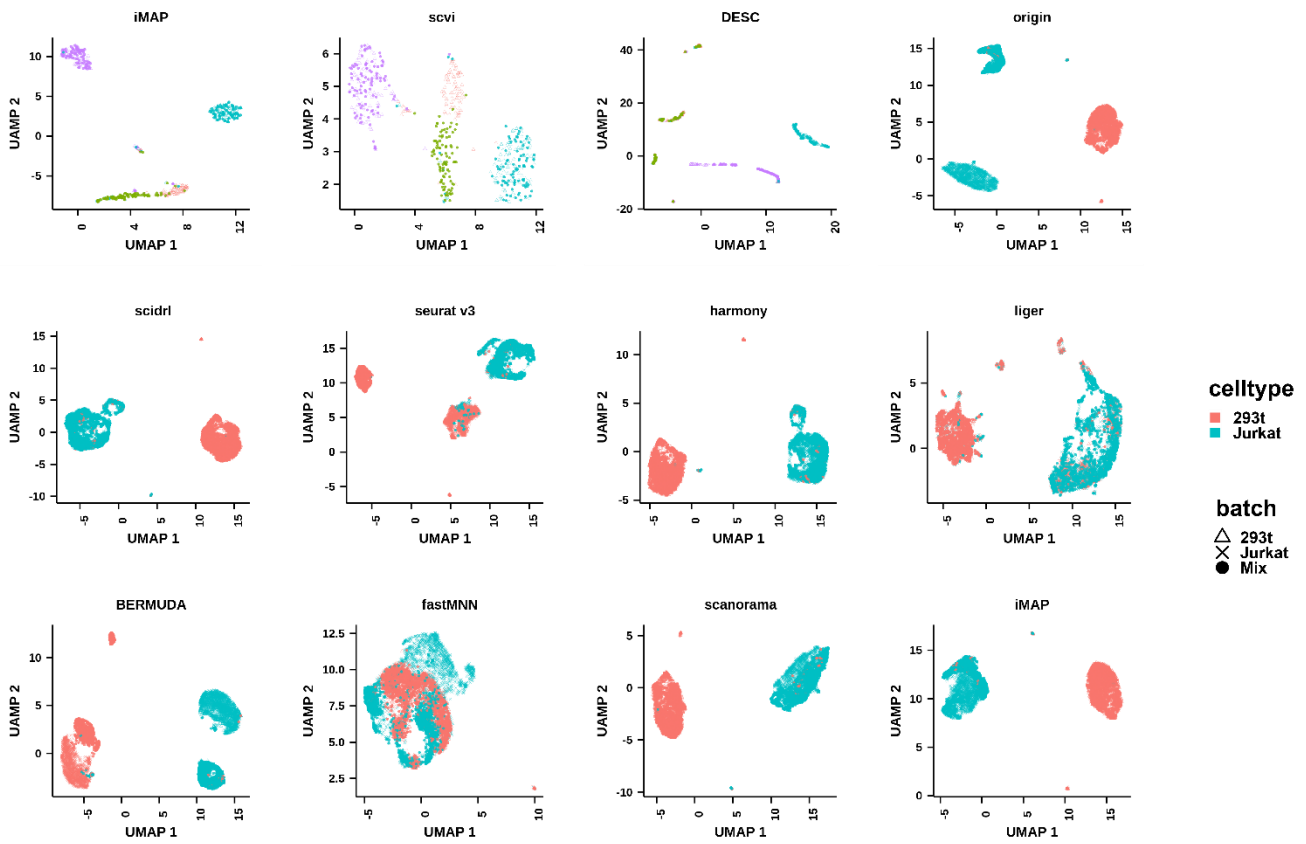

H

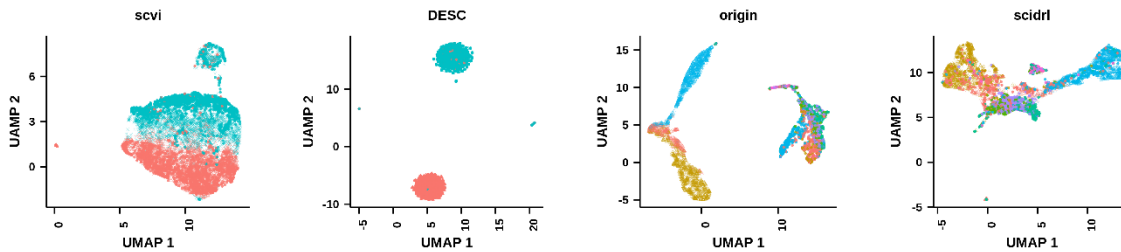

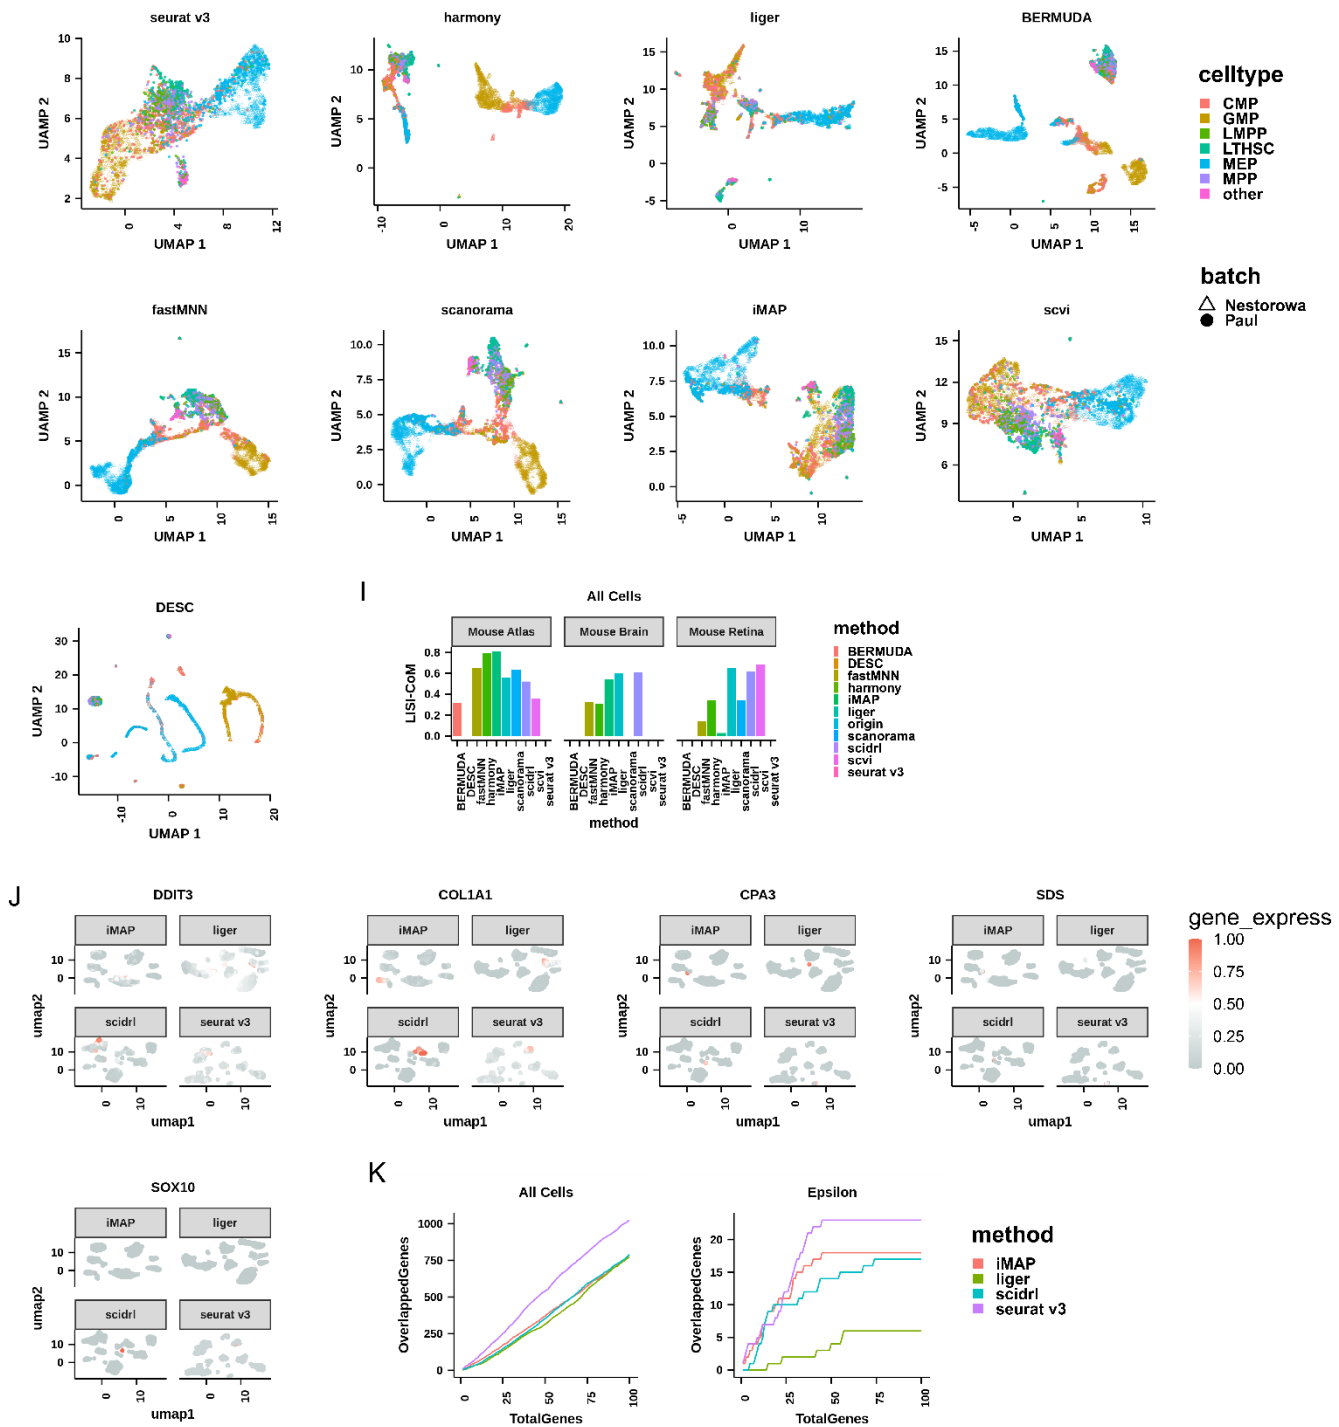

**Figure S2. Removing batch effect in two- or three-batch datasets.**

- Expression patterns of marker genes of mesenchymal, macrophage, mast, epsilon and schwann cells. Each point represents a cell and the cell is colored according to the expressions their marker genes: COL1A1, SDS, CPA3, GHRL and SOX10.
- Performance comparison of nine methods for UMAP visualizations on pancreas dataset. Each point represents a cell, the rare cells are colored according to their known cell type labels and all cells are shaped according to their batch labels.
- Performance comparison of ten methods for SILS on six rare cell types of pancreas dataset. The x-axis represents rare cell types and the y-axis represents SILS (larger value means better performance). Different colors represent different methods.
- Performance comparison of the ten integrated methods for two metrics (SILS and LISI-CoM) on 57 down-sampling pancreas datasets. The number of share cell types in each dataset ranges from one to eight. The x-axis represents LISI-batch and the y-axis represents  $1/\text{LISI-cell}$ . Different colors represent different methods.
- Performance comparison of ten integrated methods for four metrics LISI-batch & LISI-cell (left) , SILS & LISI-CoM (right) on different down-sampling pancreas datasets: dataset with alpha as shared cell type (right), dataset with endothelial as shared cell type (middle), dataset with four cell types as shared cell types (left). The x-axis represents LISI-batch or LISI-CoM and the y-axis represents  $1/\text{LISI-cell}$  or SILS. Different colors represent different methods.



- F-H. Performance comparison of ten methods for UMAP visualizations on DC (F), cell line (G) and mouse hematopoietic (H) datasets. Each point represents a cell and the cell is colored according to its known cell type label and shaped according to its batch label.
- I. Performance comparison of ten methods for LISI-CoM on mouse atlas (left), mouse brain (middle) and mouse retina dataset (right). The x-axis represents methods and the y-axis represents SILS. Different colors represent different methods.
- J. Performance comparison of four methods (SCIDRL, Seurat v3, Liger and iMAP) on integrated gene expression patterns of marker genes of ER-stress beta, mesenchymal, mast, macrophage and schwann cells. Each point represents a cell and the cell is colored according to the expression value of its marker gene.
- K. Performance comparison of the four integrated methods (SCIDRL, Seurat v3, Liger and iMAP) on overlaps between marker genes found by these methods and found by original data for each cell type. The x-axis represents top N genes and the y-axis represents the total number of overlaps in top N genes (N ranges from 1 to 100). The left panel shows the results of all cells and the right panel shows the results of epsilon cells.

A

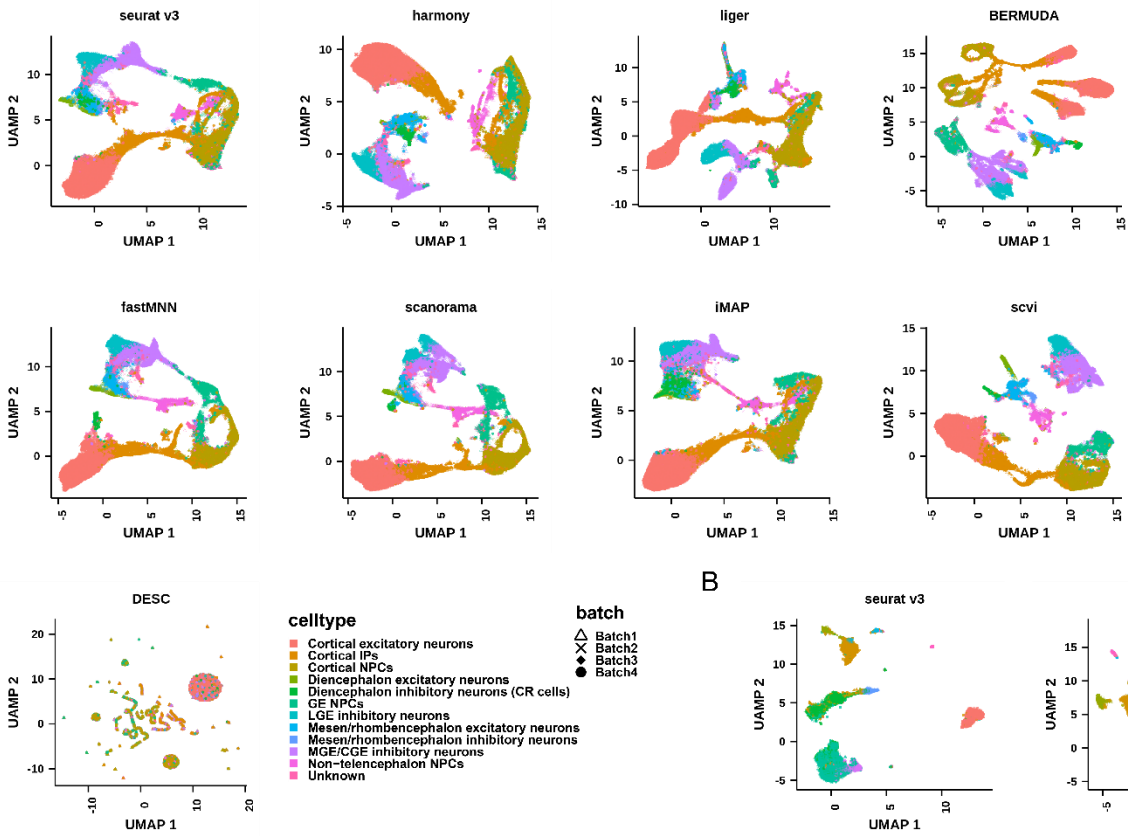

B

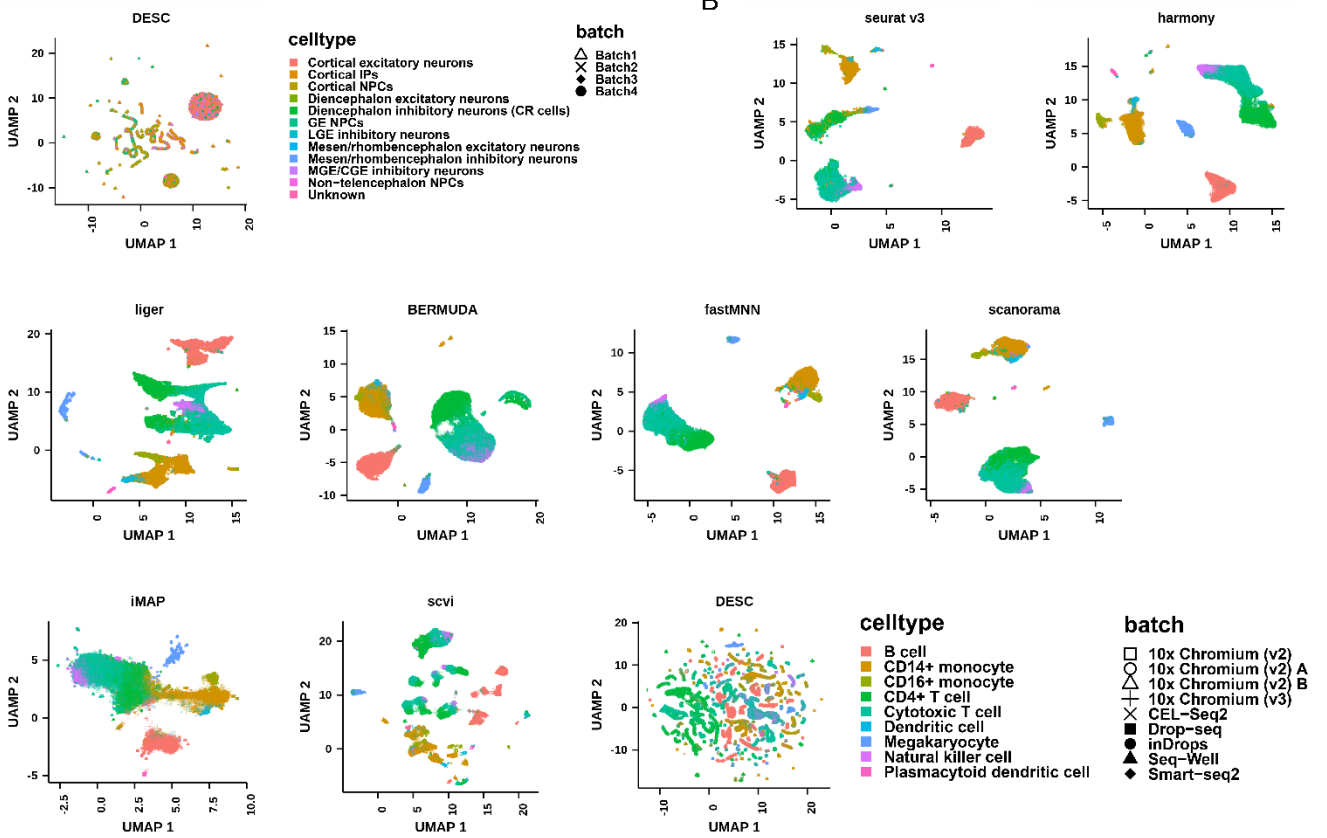

C

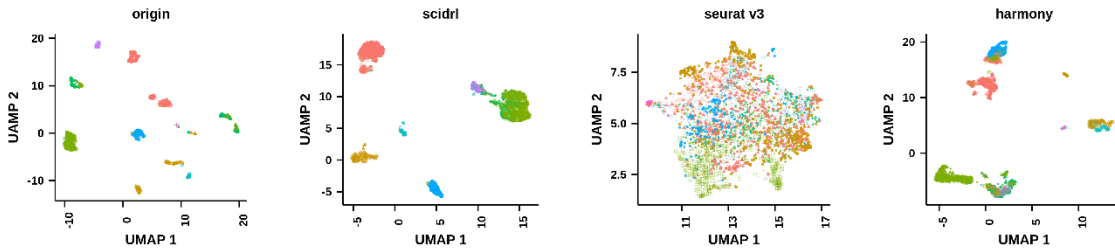

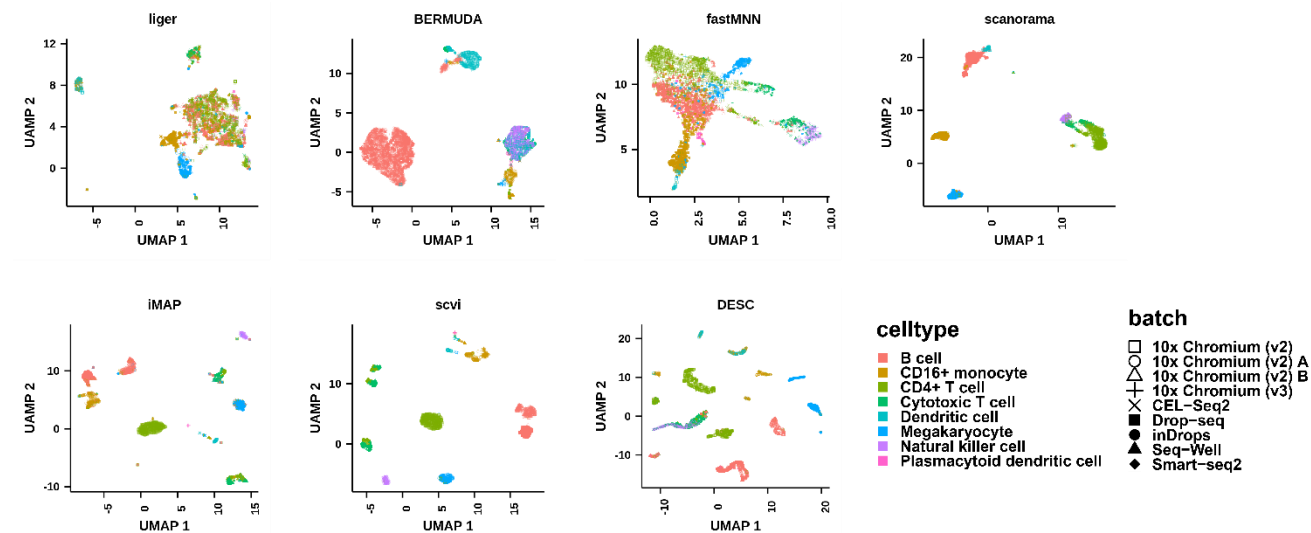

D

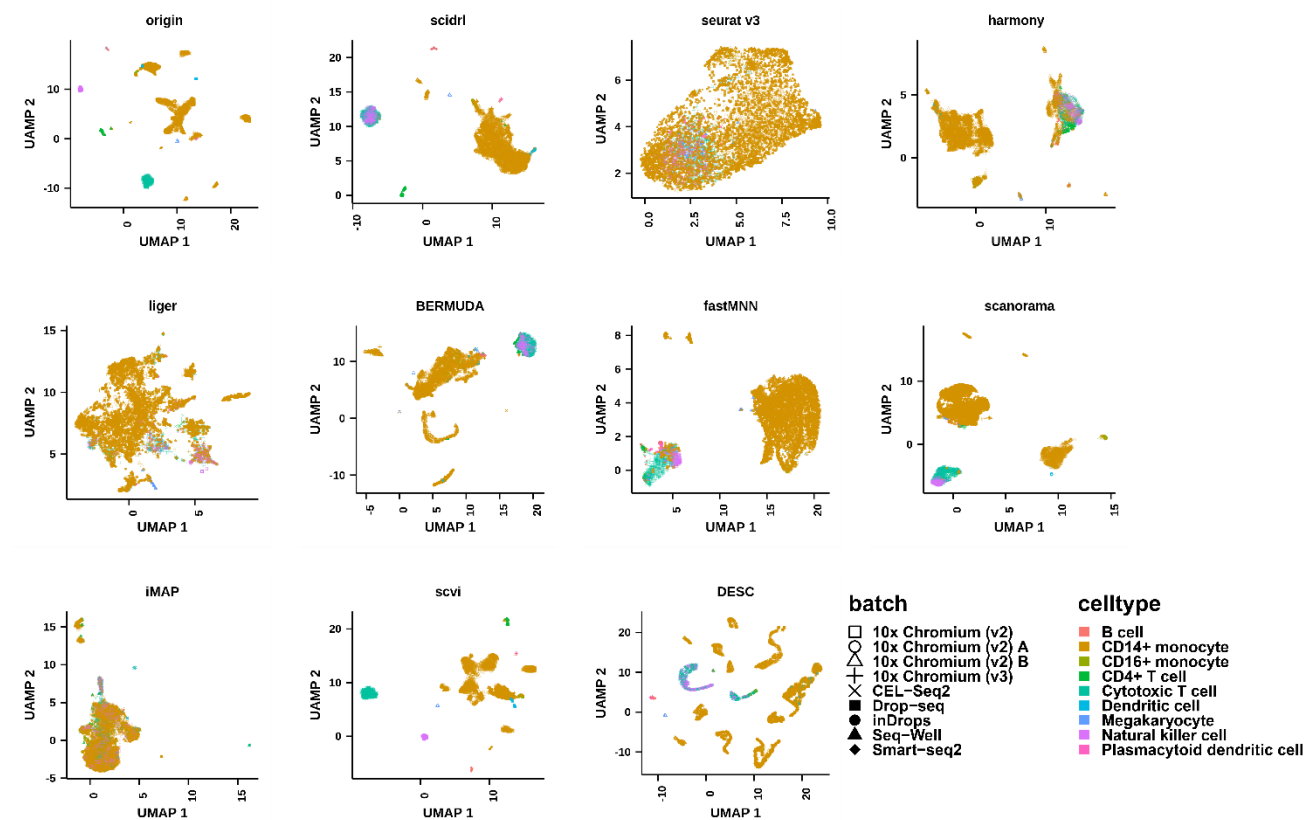

E

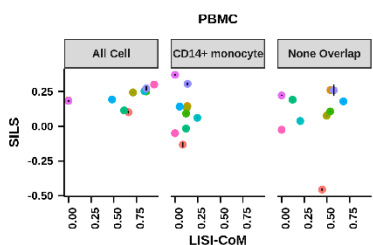

F

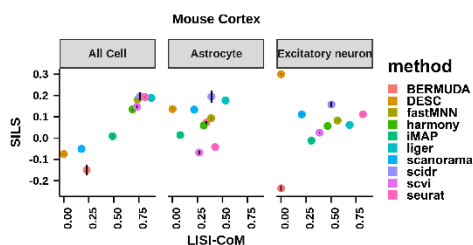

G

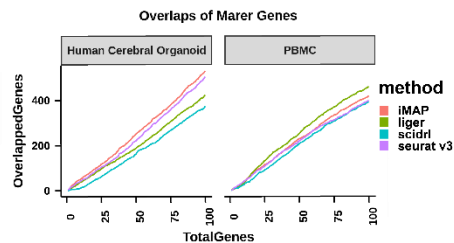

H

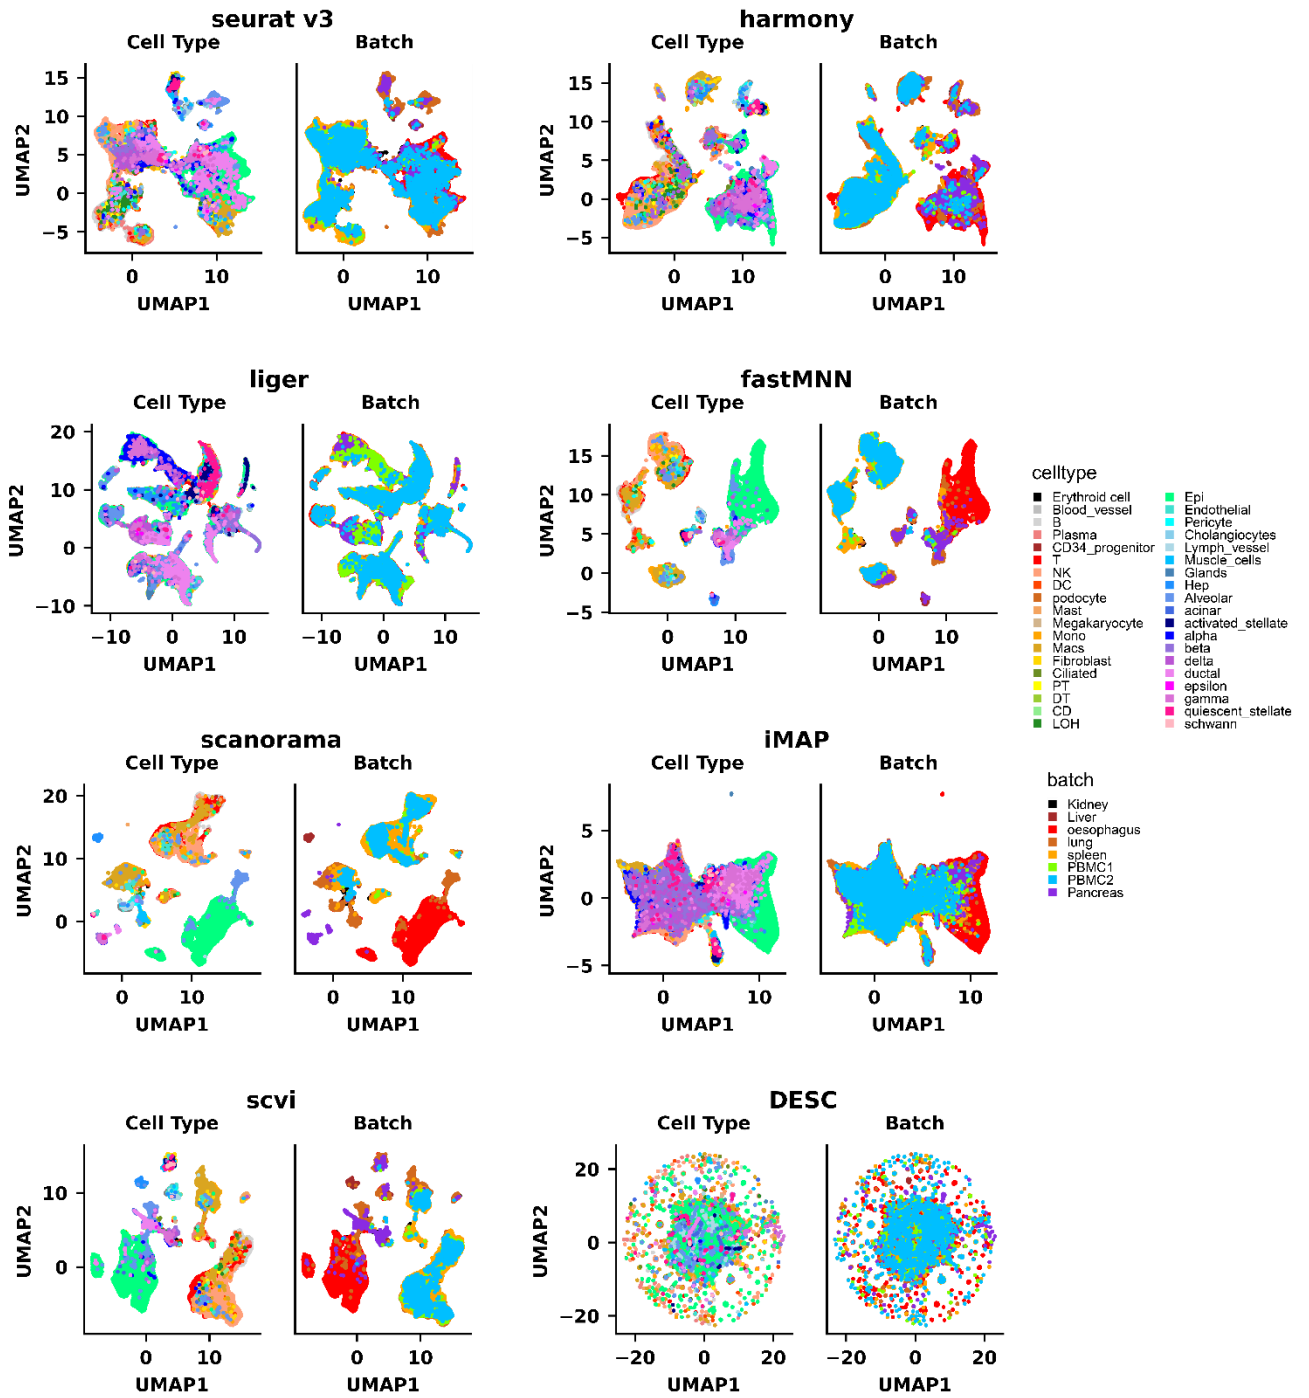

I

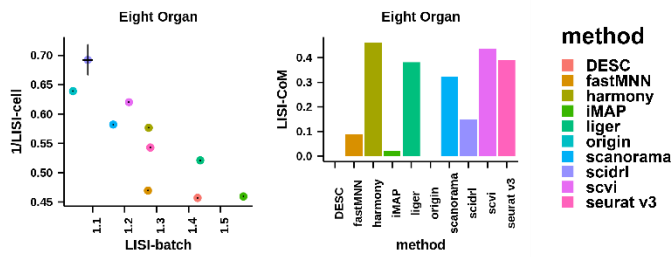

J

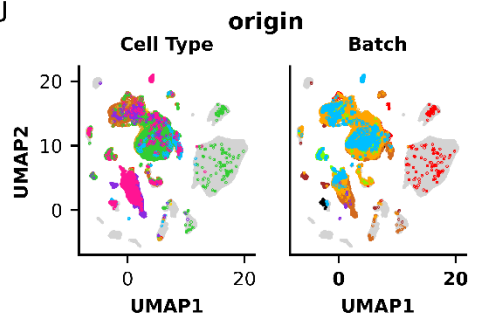

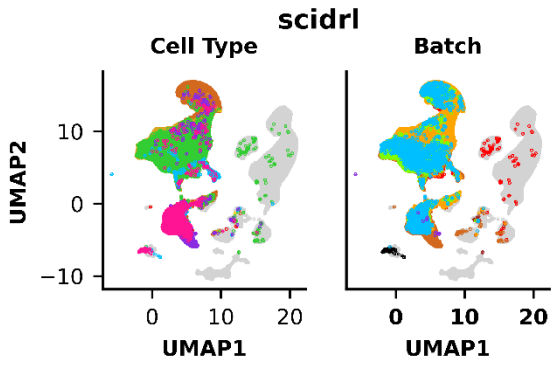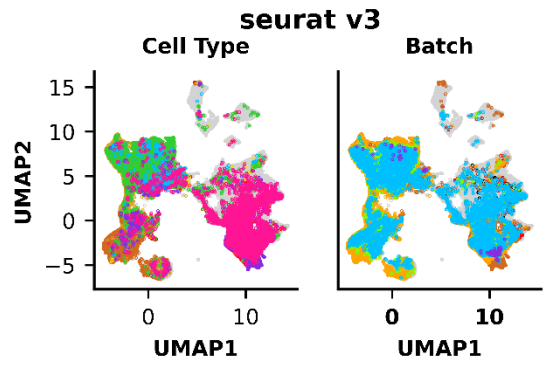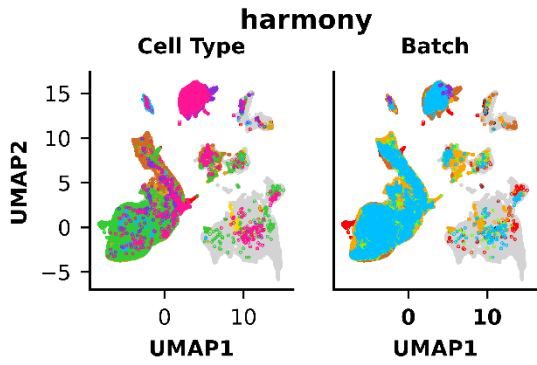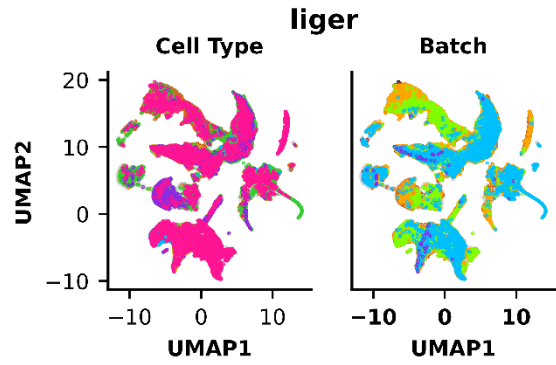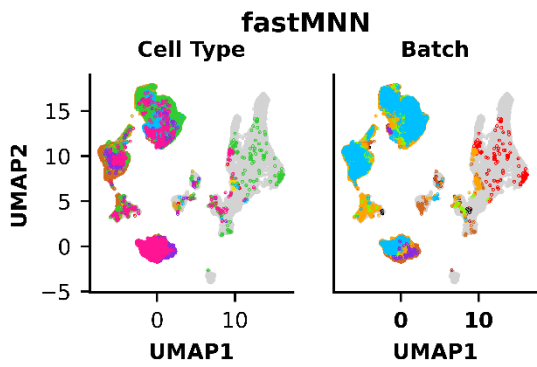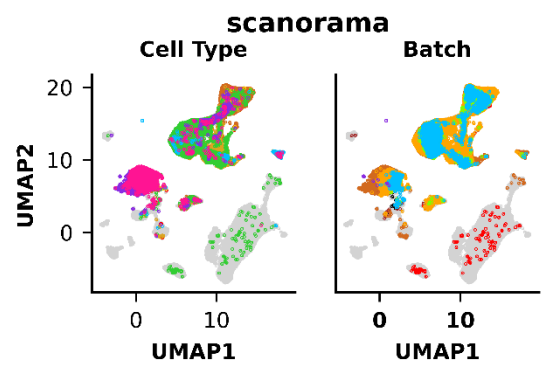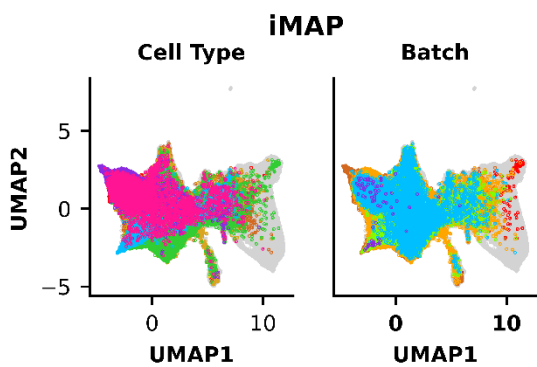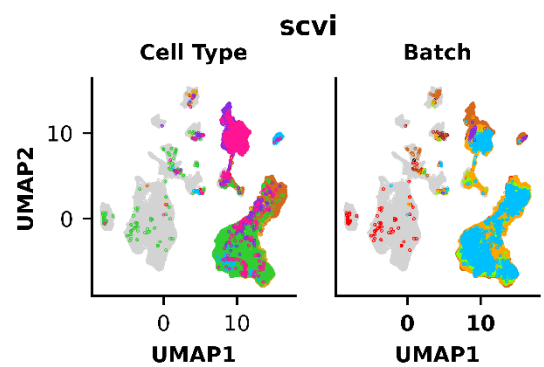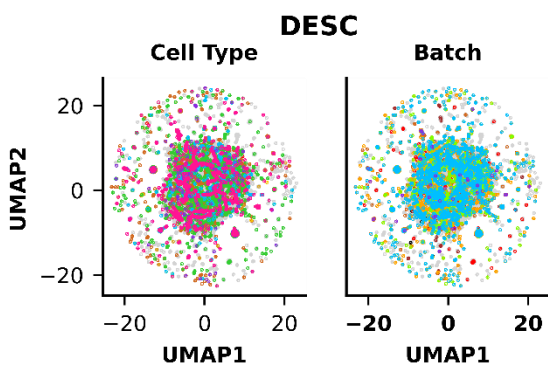

celltype

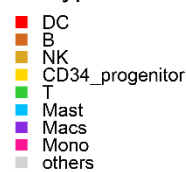

batch

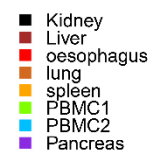

### Figure S3. Removing batch effect in multiple datasets.

- A. Performance comparison of nine methods for UMAP visualizations on human cerebral organoids dataset. Each point represents a cell and the cell is colored according to its known cell type label and shaped according to its batch label.
- B. Performance comparison of nine methods for UMAP visualizations on PBMC dataset. Each point represents a cell and the cell is colored according to its known cell type label and shaped according to its batch label.
- C. Performance comparison of ten methods for UMAP visualizations on down-sampling PBMC dataset with none shared cell type in nine batches. Each point represents a cell and the cell is colored according to its known cell type label and shaped according to its batch label.
- D. Performance comparison of ten methods for UMAP visualizations on down-sampling PBMC dataset with CD14+ monocyte as shared cell type in nine batches. Each point represents a cell and the cell is colored according to its known cell type label and shaped according to its batch label.
- E. Performance comparison of the ten integrated methods for two metrics (SILS and LISI-CoM) on PBMC (dataset with all cells (left), dataset with CD14+ monocyte as shared cell type (middle) and dataset with zero shared cell type (right)). The x-axis represents LISI-CoM and the y-axis represents SILS. Different colors represent different methods.
- F. Performance comparison of the ten integrated methods for two metrics (SILS and LISI-CoM) on mouse cortex (dataset with all cells (left), dataset with astrocyte as shared cell type (middle) and dataset with excitatory as shared cell type (right)). The x-axis represents LISI-CoM and the y-axis represents SILS. Different color represents different methods.
- G. Performance comparison of the four integrated methods (SCIDRL, Seurat v3, Liger and iMAP) on overlaps between marker genes found by these methods and found by original data for each cell type on human cerebral organoids (left) and PBMC dataset (right). The x-axis represents top N genes and the y-axis represents the total number of overlaps in top N genes (N ranges from 1 to 100).
- H. Performance comparison of nine methods (except for Bermuda) for UMAP visualizations on eight-organ dataset. Each point represents a cell and the cell is colored according to its known cell type label (left) and its batch label (right).
- I. Performance comparison of the ten integrated methods for three metrics on eight-organ dataset (Left: LISI-batch and 1/LISI-cell, Right: LISI-CoM). The x-axis represents LISI-batch or methods and the y-axis represents 1/LISI-cell or LISI-CoM. Different colors represent different methods.
- J. Performance comparison of the nine integrated methods (except for Bermuda) for UMAP visualization on eight-organ dataset. Each point represents a cell, the immune cells are colored according to their known cell type labels and the remaining cells are colored using gray (left), all cells are colored according to its batch label (right).

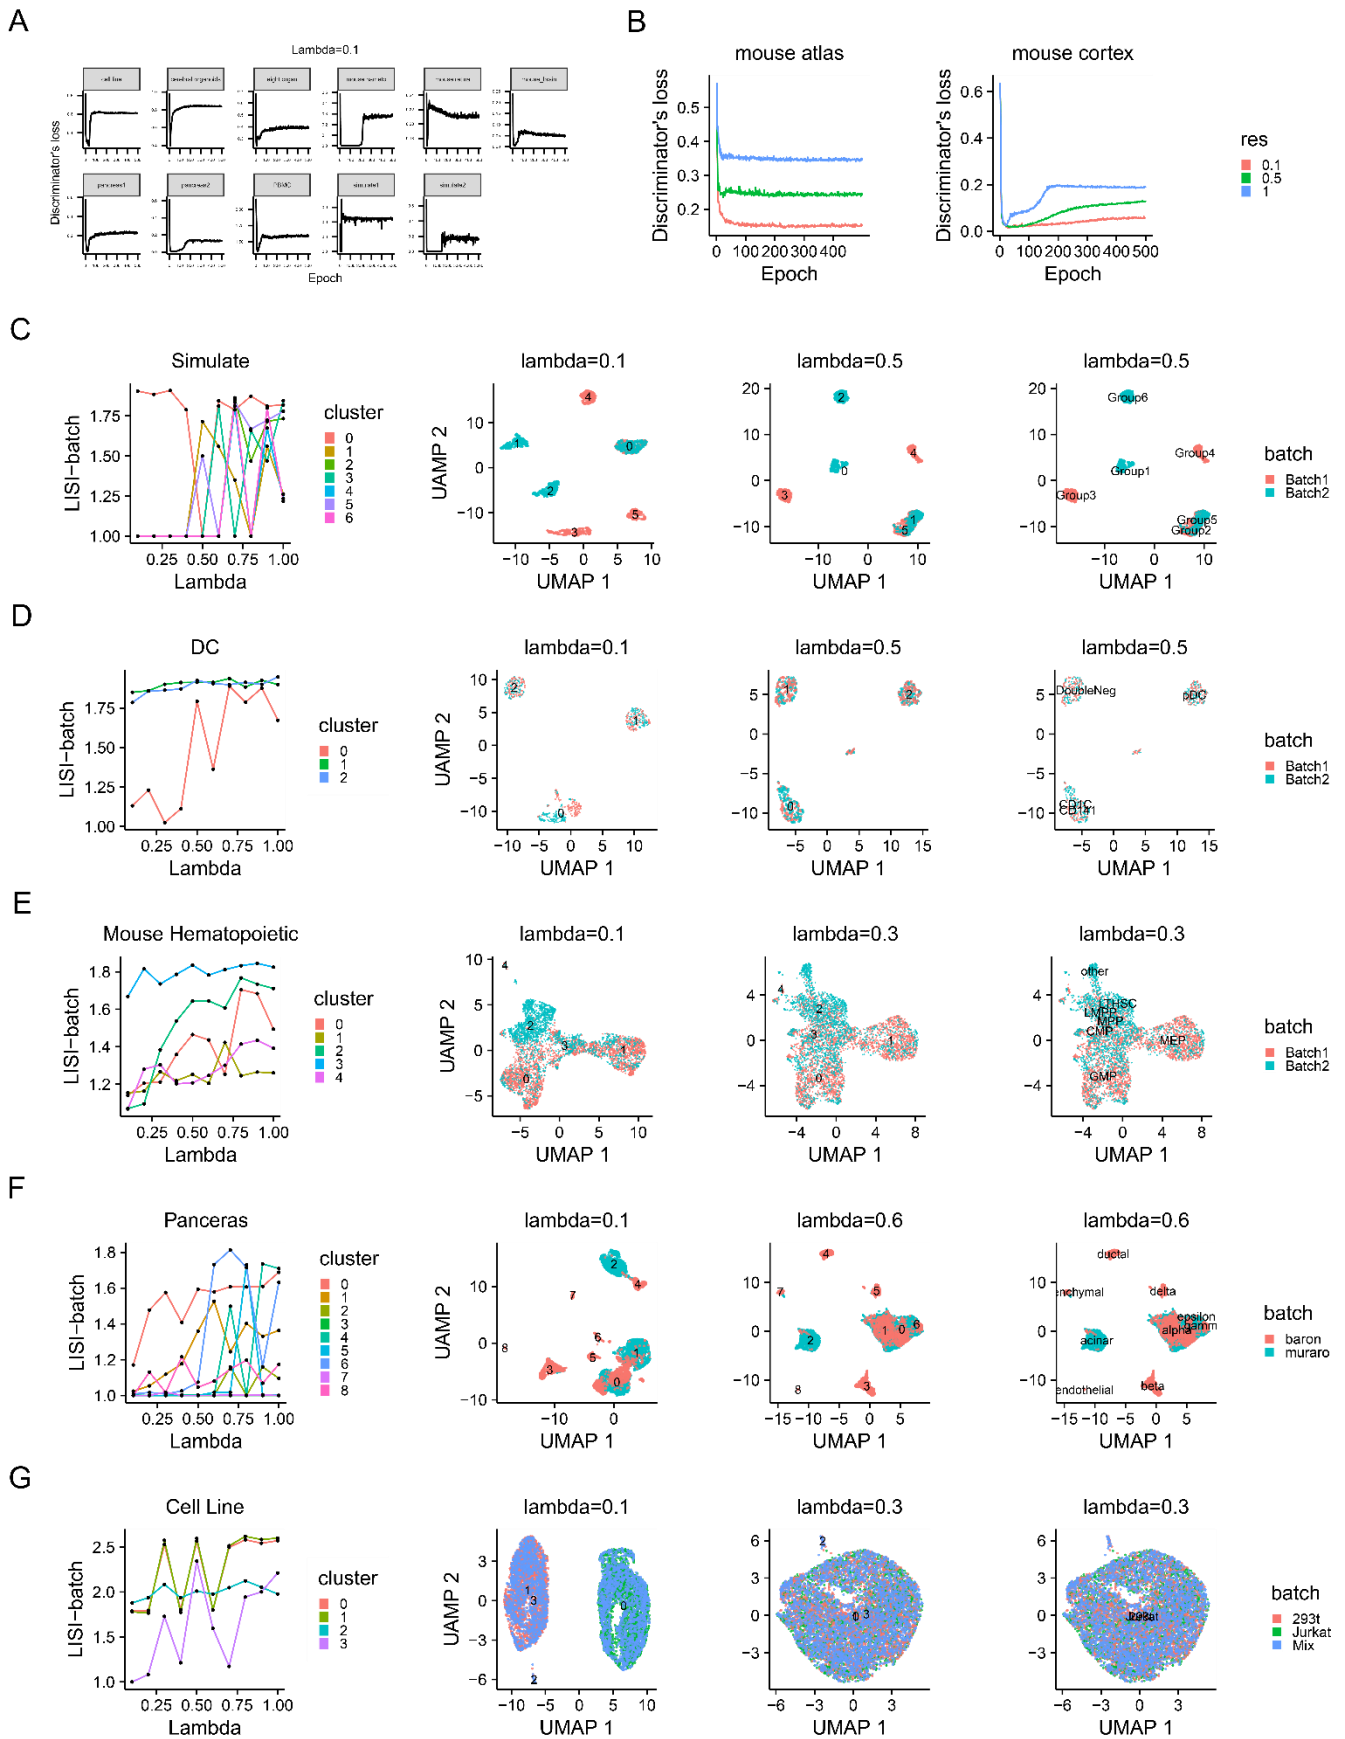

H

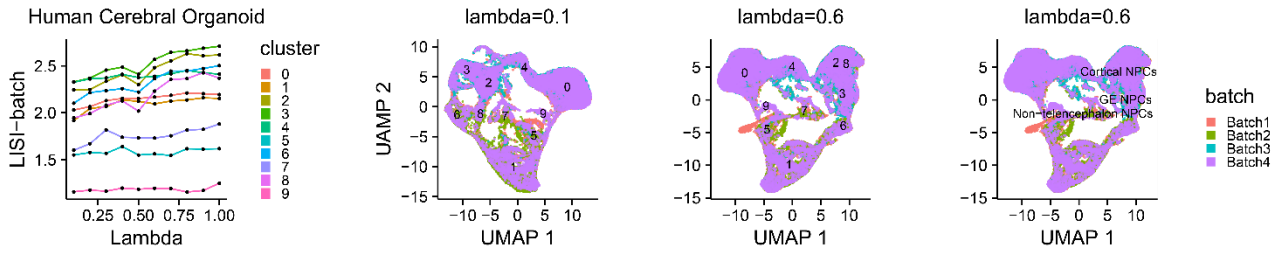

I

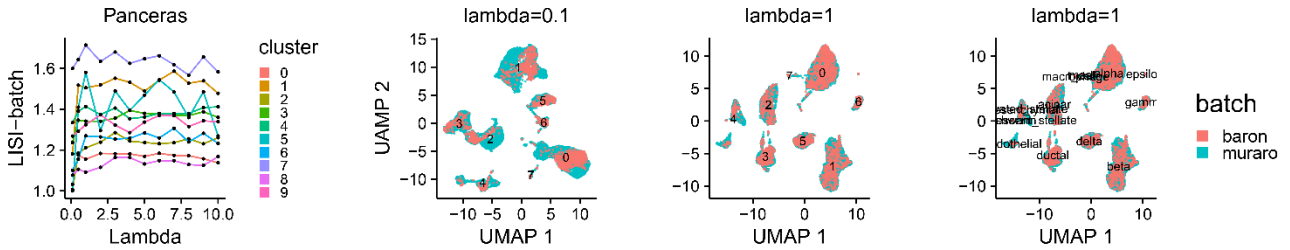

**Figure S4. Parameter selections on datasets.**

- A. Variation curves of Discriminator's loss  $\widehat{loss}_2$  when  $\lambda = 0.1$  for datasets with 0.1 as base value. The x-axis represents the number of epochs and the y-axis represents the value of  $\widehat{loss}_2$ .
- B. Variation curves of Discriminator's loss  $\widehat{loss}_2$  for mouse atlas (left) and mouse cortex data (right) for different  $\lambda$ . The x-axis represents the number of epochs and the y-axis represents the value of  $\widehat{loss}_2$ . The colors represent different values of  $\lambda$ .
- C. Parameter selections on Simulated 2 data: The x-axis corresponds to the values (from  $\lambda_{base}$  to 1 or 10) of  $\lambda$ . The y-axis represents the LISI-batch value for the dataset (first on the left). UMAP visualizations of different values of  $\lambda$ , which are  $\lambda_{base}$  (second on the left),  $\lambda_{critical}$  for cluster labels (third on the left) and for known cell type labels (fourth on the left). Different colors represent different batches. The clusters are identified by Louvain clustering.
- D-I. the same as (C) on different datasets: DC (D), mouse hematopoietic (E), down-sampled pancreas (F), cell line (G), human cerebral organoid (H) and pancreas (I) datasets.



| Dataset                  | Batch | Cell                                                                      | Gene  | Technology                                                                                                    | Percentage of shared cells (types) (%) | Number of rare cell types (proportion)          | $\lambda$ |
|--------------------------|-------|---------------------------------------------------------------------------|-------|---------------------------------------------------------------------------------------------------------------|----------------------------------------|-------------------------------------------------|-----------|
| simulated 1              | 2     | 4,000<br>4,500                                                            | 500   | simulated                                                                                                     | 100<br>(100)                           | 1<br>(0.01)                                     | 0.1       |
| simulated 2              | 2     | 695<br>665                                                                | 500   | simulated                                                                                                     | 27.1<br>(16.7)                         | 0                                               | 0.1       |
| Pancreas                 | 2     | 8,654<br>2,122                                                            | 1,398 | CEL-seq2<br>Drop-seq                                                                                          | 94<br>(53.3)                           | 6<br>(0.0006,0.001,0.001,0.002,<br>0.005,0.007) | 1         |
| DC                       | 2     | 283,<br>286                                                               | 1,596 | Smart-seq<br>Smart-seq                                                                                        | 66.8<br>(50)                           | 0                                               | 0.4       |
| Mouse hemato             | 2     | 2,729<br>1,920                                                            | 4,649 | Smart-seq2<br>MARS-seq                                                                                        | 76.2<br>(42.8)                         | 0                                               | 0.2       |
| Mouse Atlas              | 2     | 21,855<br>13,320                                                          | 20,00 | Micro-seq<br>Smart-seq                                                                                        | 100<br>(100)                           | 0                                               | 1         |
| Mouse Brain              | 2     | 302,175<br>156,049                                                        | 1,970 | Drop-seq<br>SPLiT-seq                                                                                         | 99.4<br>(64.2)                         | 8<br>(e-3, e-4, e-5)                            | 1         |
| Mouse Retina             | 2     | 44,808<br>27,499                                                          | 1,460 | Drop-seq<br>Drop-seq                                                                                          | 97.4<br>(38.5)                         | 9<br>(e-3, e-4, e-5)                            | 0.1       |
| Cell Line                | 3     | 3,053<br>2,676<br>3,162                                                   | 2,000 | 10x<br>10x<br>10x                                                                                             | Median:70.8<br>(Median:50)             | 0                                               | 0.2       |
| Human Cerebral Organoids | 4     | 17,019<br>8,581<br>9,433<br>14,120                                        | 2,000 | 10x<br>10x<br>10x<br>10x                                                                                      | Median:99.2<br>(Median:91.3)           | 1<br>(9e-3)                                     | 0.4       |
| PBMC                     | 18    | 526<br>526<br>3,222<br>3,222<br>3,222<br>6,584<br>3,727<br>6,584<br>3,362 | 2,146 | 10x (v2)_A<br>10x (v2)_B<br>10x (v2)<br>10x (v3)<br>inDrops<br>Seq-Well<br>Drop-seq<br>CEL-Seq2<br>Smart-seq2 | Median:99<br>(Median:82.6)             | 1<br>(0.005)                                    | 5         |
| Mouse Cortex             | 8     | 644<br>5,571<br>3,130<br>5,599                                            | 2,000 | Smart-seq2<br>DroNC-seq<br>10x (v2)<br>sci-RNA-seq                                                            | Median:87.1<br>(Median:57.1)           | 0                                               | 5         |
| Eight Organ              | 8     | 4,487<br>8,367<br>87,947<br>57,020<br>94,257<br>6,584<br>8,569            | 1,319 | Drop-seq<br>inDrops<br>10x (v3)                                                                               | Median:21.4<br>(Median:20.6)           | 0                                               | 0.1       |

**Table S1 – Statistics of Datasets.**

Each column corresponds to one statistic, each row corresponds to one dataset.

| Dataset                                          | Percentage of shared cells (%) | Percentage of shared cell types (%) | LISI-CoM (ranking) | SILS (ranking) | Combination (ranking) | Median/Mean (ranking) |
|--------------------------------------------------|--------------------------------|-------------------------------------|--------------------|----------------|-----------------------|-----------------------|
| PBMC (None Overlap)                              | 0                              | 0                                   | 2                  | 2              | 2                     | 3/3.5                 |
| Pancreas-LL (endothelial)                        | 7.7                            | 11.1                                | 4                  | 2              | 3                     |                       |
| Eight Organ                                      | Median:21.4                    | Median:20.6                         | 6                  |                | 6                     |                       |
| Simulated 2                                      | 27.1                           | 16.7                                | 1                  | 5              | 3                     |                       |
| Pancreas-LM (delta, endothelial, epsilon, gamma) | 24.5                           | 26.67                               | 4                  | 1              | 2.5                   | 2.5/2.5               |
| Pancreas-ML (alpha)                              | 60.5                           | 11.1                                | 1                  | 1              | 1                     | 2/2                   |
| Mouse Cortex (Astrocyte)                         | Median: 63.3                   | Median: 25                          | 3                  | 1              | 2                     |                       |
| PBMC (CD14+ monocyte)                            | 79.5                           | 33.3                                | 2                  | 2              | 2                     |                       |
| Mouse Retina                                     | 97.4                           | 38.5                                | 3                  |                | 3                     |                       |
| Mouse Hemato                                     | 76.2                           | 42.8                                | 1                  | 1              | 1                     |                       |
| Mouse Cortex (Excitatory neuron)                 | Median: 89.5                   | Median: 45                          | 4                  | 2              | 3                     |                       |
| DC                                               | 66.8                           | 50                                  | 1                  | 6              | 3.5                   |                       |
| Cell Line                                        | Median:70.8                    | Median:50                           | 1                  | 6              | 3.5                   |                       |
| Pancreas                                         | 94                             | 53.3                                | 1                  | 3              | 2                     |                       |
| Mouse Cortex                                     | Median:87.1                    | Median:57.1                         | 3                  | 1              | 2                     |                       |
| Mouse Brain                                      | 99.4                           | 64.2                                | 1                  |                | 1                     |                       |
| PBMC                                             | Median:99                      | Median:82.6                         | 2                  | 2              | 2                     |                       |
| Human Cerebral Organoids                         | Median:99.2                    | Median:91.3                         | 1                  | 1              | 1                     |                       |
| Simulated1                                       | 100                            | 100                                 | 1                  | 6              | 3.5                   |                       |
| Mouse Atalas                                     | 100                            | 100                                 | 6                  | 6              | 3.5                   |                       |

**Table S2 – Performance of SCIDRL on different categories of datasets**

Each column corresponds to one statistic, each row corresponds to one dataset. The colors represent different categories of datasets, which is little shared cells and little shared cell types (LL), little shared cells and many shared cell types (LM), many shared cells and little shared cell types (ML) and many shared cells and many shared cell types (MM).
